# Supplementary material for: Evidence of a Role of Tumor Necrosis Factor α in Refractory Asthma
Source: Atypon-hosted journal article supplement (doi:10.1056/nejmoa050580), 2006-02-15
Supplement: nejm_berry_697sa1.pdf [file nejm_berry_697sa1.pdf]

## Supplementary Appendix

This appendix has been provided by the authors to give readers additional information about their work.

Supplement to: Berry MA, Hargadon B, Shelley M, et al. Evidence of a role of tumor necrosis factor  $\alpha$  in refractory asthma. *N Engl J Med* 2006;354:697-708.

## **Appendix**

### **Measurement of sputum mediators**

Sputum IL-8, Cysteinyl-leukotriene (LTC<sub>4</sub>, D<sub>4</sub> & E<sub>4</sub>) and Histamine were measured using standard ELISA kits (BD Pharmagen, Immunotech and Cayman chemicals respectively) and eosinophilic cationic protein (ECP) was measured using a fluorescence immunoassay (UniCAP test, Pharmacia, Uppsala, Sweden). These assays have been previously validated for use in sputum supernatants (S1). The sensitivity levels of the assay were 2, 13x10<sup>-3</sup>, 0.8x10<sup>-3</sup>, 50x10<sup>-3</sup> ng/ml for ECP, cysteinyl leukotrienes, IL-8 and histamine. The intra-assay coefficient of variability was 5-10% and the interassay coefficient of variability 3-15% across a range of concentrations of mediators measured.

### **References**

S1 Birring SS, Parker D, Brightling CE, Bradding P, Wardlaw AJ, Pavord ID. Induced sputum inflammatory mediator concentrations in chronic cough. Am J Respir Crit Care Med 2004; 169:15-19.

Supplementary table

| Week                                        | Placebo    |           |            |                                        | Etanercept |           |            |                                        | Between treatment difference (95% C.I.) |
|---------------------------------------------|------------|-----------|------------|----------------------------------------|------------|-----------|------------|----------------------------------------|-----------------------------------------|
|                                             | 0          | 5         | 10         | Within treatment difference (95% C.I.) | 0          | 5         | 10         | Within treatment difference (95% C.I.) |                                         |
| Visual analogue scores                      |            |           |            |                                        |            |           |            |                                        |                                         |
| -Cough                                      | 54 (25)    | 49 (24)   | 44 (24)    | -10 (-24, 4)                           | 43 (18)    | 33 (22)   | 27 (22)    | -16 (-32, 1)                           | -5 (-28, 17)                            |
| -Wheeze                                     | 39 (37)    | 38 (31)   | 35 (29)    | -3 (-17, 12)                           | 26 (21)    | 25 (25)   | 17 (16)    | -9 (-21, 4)                            | -6 (-29, 16)                            |
| -Breathlessness                             | 53 (29)    | 49 (26)   | 57 (24)    | 4 (-15, 23)                            | 56 (27)    | 35 (25)   | 32 (26)    | -24 (-41, -7)*                         | -28 (-62, 6)                            |
| <i>Juniper Asthma Quality of Life Score</i> |            |           |            |                                        |            |           |            |                                        |                                         |
| -Symptoms                                   | 3.8 (1.4)  | 4.1 (1.3) | 3.8 (1.3)  | 0.01 (-0.30, 0.31)                     | 3.7 (1.0)  | 4.5 (1.3) | 4.8 (1.3)  | 1.13 (0.50, 1.77)**                    | 1.15 (0.19, 2.1)*                       |
| -Activities                                 | 4.2 (1.2)  | 4.2 (1.3) | 4.2 (1.2)  | 0.01 (-0.21, 0.21)                     | 4.4 (0.9)  | 4.8 (0.9) | 5.1 (1.1)  | 0.78 (0.18, 1.38)*                     | 0.79 (-0.01, 1.59)                      |
| -Emotions                                   | 4.4 (1.4)  | 4.6 (1.5) | 4.2 (1.7)  | -0.2 (-0.88, 0.68)                     | 4.2 (1.4)  | 4.6 (1.3) | 5.0 (1.4)  | 0.72 (0.12, 1.30)*                     | 0.88 (0.01, 1.75)*                      |
| -Environment                                | 4.5 (1.4)  | 4.5 (1.4) | 4.6 (1.4)  | 0.02 (-0.07, 0.1)                      | 4.3 (1.0)  | 4.5 (1.2) | 4.8 (1.3)  | 0.4 (0.02, 0.78)*                      | 0.28 (-0.46, 1.0)                       |
| Alveolar NO concentration (ppb)             | 10.8 (17)  | 6.6 (3.8) | 9.2 (9.8)  | -1.6 (-9.2, 6.1)                       | 9.8 (10)   | 4.7 (2.5) | 6.1 (3.5)  | -3.8 (-11, 3.1)                        | 1.6 (-6.1, 9.3)                         |
| Sputum IL-8 (ngml <sup>-1</sup> )           | 164.8 (22) | -         | 143.9 (40) | -20.9 (-69, 27)                        | 171.5 (23) | -         | 153.0 (23) | -18 (-48, 13)                          | 2.5 (-2.3, 7.3)                         |
| Sputum Cys-Lt (ngml <sup>-1</sup> )         | 9.5 (2.9)  | -         | 8.6 (2.5)  | -0.8 (-5, 3.4)                         | 10.0 (2.8) | -         | 10.2 (1.5) | 0.2 (-4.7, 5.1)                        | 1.0 (-3.0, 4.1)                         |
| Sputum ECP (µgml <sup>-1</sup> )            | 1.1 (0.2)  | -         | 1.3 (0.2)  | 0.2 (-0.1, 0.4)                        | 1.0 (0.2)  | -         | 0.9 (0.2)  | -0.07 (-0.2, 0.06)                     | -0.3 (-0.6, 0.1)                        |

Supplementary table

Mean (S.D.) measurements from patients before and after placebo and etanercept treatment with within treatment and between treatment differences and 95% confidence intervals. IL-8 – interleukin 8, Cys-Lt – Cysteinyl leukotriene, ECP – eosinophilic cationic protein. Data given as mean (standard deviation) except where marked † geometric mean (log standard deviation). Between group results are given as mean difference (95% confidence intervals) except where marked † where fold difference (95% confidence intervals) are given. \* denote  $p < 0.05$  and \*\*  $p < 0.01$ .
